# Supplementary material for: Altered flexor carpi radialis motor axon excitability properties after cerebrovascular stroke
Source: Frontiers journal article supplement (doi:10.3389/fneur.2023.1172960), 2023-05-22
Supplement: Data_Sheet_1.PDF [file Data_Sheet_1.PDF]

Table 1. Final model parameters that best fit healthy control, nonparetic, and paretic FCR axons

| Parameter                                                | Original model | Control limb | Nonparetic limb | Paretic limb  |
|----------------------------------------------------------|----------------|--------------|-----------------|---------------|
| ENR<br>Nodal resting potential                           | -82.7          | -85.5        | <b>-87.8</b>    | <b>-87.8</b>  |
| EIR<br>Internodal resting potential                      | -82.7          | -85.7        | <b>-88.1</b>    | <b>-88.2</b>  |
| PNaN<br>Nodal Na <sup>+</sup> permeability               | 4.1            | 4.1          | 4.1             | 4.1           |
| PNap(%)<br>Percent persistent sodium                     | 0.895          | 0.895        | 0.895           | 0.895         |
| GKsN<br>Nodal slow K <sup>+</sup> conductance            | 47.6           | 54           | 54              | 54            |
| GKsl<br>Internodal slow K <sup>+</sup> conductance       | 0.24           | 0.24         | 0.24            | 0.24          |
| GKfN<br>Nodal fast K <sup>+</sup> conductance            | 22             | 20           | 20              | 20            |
| GKfl<br>Internodal fast K <sup>+</sup> conductance       | 100            | 175          | 175             | 175           |
| Ih<br>Internodal H conductance                           | 6.3            | 1.55         | <b>1.2</b>      | <b>1.1</b>    |
| GLkN<br>Nodal leak conductance                           | 1.53           | 1.53         | 1.53            | 1.53          |
| GLkl<br>Internodal leak conductance                      | 2.05           | 2.25         | <b>3.1</b>      | <b>3.0</b>    |
| GBB<br>Barrett-Barrett conductance                       | 35.8           | 27.7         | 27.7            | 27.7          |
| CMy<br>Myelin capacitance                                | 1.55           | 2.2          | 2.2             | 2.2           |
| CAX<br>Internodal capacitance                            | 0.273          | 0.253        | 0.253           | 0.253         |
| IPumpNI<br>Nodal and intermodal pump currents            | 0              | 0.0068       | <b>0.0175</b>   | <b>0.0175</b> |
| Aah<br>Rate activation of Na <sup>+</sup> channel h gate | 0.0245         | 0.0245       | 0.0245          | <b>0.021</b>  |
| Tabs<br>Absolute temperature                             | 301.8          | 302.5        | 302.5           | 302.5         |

Axon parameters of the original model, and FCR parameters in the control, nonparetic, and paretic limb. The stroke limb parameters that differed from the control limb parameters are bolded in red. The original model parameters correspond to the best-fit simulation of APB axon responses in healthy adults described previously (Kiernan et al., 2000) (NC29 parameters included in the Qtrac software).

Table 2. Means of blood serum constituents and correlations of these constituents with selected FCR axon excitability parameters in the paretic limb after stroke.

|                         | Mean $\pm$ SE<br>range       | TEd(10-20)%  |             | TEd(90-100)% |             | TEh(90-100)% |             | Resting I/V<br>slope |             | RRP         |             | Superexcitability |          |
|-------------------------|------------------------------|--------------|-------------|--------------|-------------|--------------|-------------|----------------------|-------------|-------------|-------------|-------------------|----------|
|                         |                              | <i>R</i>     | <i>P</i>    | <i>R</i>     | <i>P</i>    | <i>R</i>     | <i>P</i>    | <i>R</i>             | <i>P</i>    | <i>R</i>    | <i>P</i>    | <i>R</i>          | <i>P</i> |
| Potassium<br>(3.5-5)    | 4.0 $\pm$ 0.07<br>3.42-4.5   | -0.42        | 0.10        | -0.47        | 0.06        | <b>0.59</b>  | <b>0.01</b> | <b>0.51</b>          | <b>0.04</b> | <b>0.48</b> | <b>0.05</b> | 0.38              | 0.17     |
| Sodium<br>(135-147)     | 143.4 $\pm$ 0.5<br>140-147   | -0.03        | 0.8         | 0.05         | 0.82        | -0.12        | 0.66        | 0.11                 | 0.68        | 0.03        | 0.88        | 0.11              | 0.67     |
| Chloride<br>(96-106)    | 103.1 $\pm$ 0.6<br>97.4-108  | -0.13        | 0.63        | -0.13        | 0.61        | 0.15         | 0.57        | 0.18                 | 0.50        | -0.11       | 0.67        | -0.19             | 0.48     |
| Calcium<br>(2.0-2.5)    | 2.28 $\pm$ 0.02<br>2.13-2.42 | <b>-0.52</b> | <b>0.04</b> | -0.48        | 0.07        | <b>0.56</b>  | <b>0.03</b> | 0.32                 | 0.23        | 0.23        | 0.41        | 0.46              | 0.08     |
| Magnesium<br>(0.8-1.25) | 1.0 $\pm$ 0.03<br>0.84-1.26  | 0.47         | 0.07        | <b>0.55</b>  | <b>0.03</b> | -0.32        | 0.24        | -0.39                | 0.14        | -0.47       | 0.07        | -0.43             | 0.10     |
| Glucose<br>(3.89-6.11)  | 5.14 $\pm$ 0.16<br>4.31-7.02 | -0.07        | 0.79        | 0.02         | 0.89        | -0.02        | 0.88        | -0.11                | 0.67        | 0.13        | 0.63        | 0.25              | 0.35     |
| Urea<br>(1.7-8.3)       | 4.32 $\pm$ 0.31<br>2.83-6.86 | -0.34        | 0.21        | -0.10        | 0.70        | 0.28         | 0.31        | 0.30                 | 0.27        | 0.27        | 0.33        | 0.24              | 0.38     |
| Creatine<br>(40-124)    | 75.8 $\pm$ 3.5<br>57-111     | -0.27        | 0.32        | -0.09        | 0.72        | 0.10         | 0.70        | -0.13                | 0.63        | -0.15       | 0.60        | -0.03             | 0.88     |

Serum levels are expressed in mmol/L except for creatine ( $\mu$ mol/L). Normal ranges for serum concentrations are shown in brackets. *R* = the correlation coefficient between the excitability parameter and the serum concentration. *P* = the probability of obtaining such a correlation by chance. Significant correlations are bolded.

Table 3. Means of blood serum constituents and correlations of these constituents with selected FCR axon excitability parameters in the nonparetic limb after stroke.

|                         | Mean $\pm$ SE<br>range       | TEd(10-20)%  |             | TEd(90-100)% |             | TEh(90-100)% |              | Resting I/V<br>slope |             | RRP         |             | Superexcitability |          |
|-------------------------|------------------------------|--------------|-------------|--------------|-------------|--------------|--------------|----------------------|-------------|-------------|-------------|-------------------|----------|
|                         |                              | <i>R</i>     | <i>P</i>    | <i>R</i>     | <i>P</i>    | <i>R</i>     | <i>P</i>     | <i>R</i>             | <i>P</i>    | <i>R</i>    | <i>P</i>    | <i>R</i>          | <i>P</i> |
| Potassium<br>(3.5-5)    | 4.0 $\pm$ 0.07<br>3.42-4.5   | <b>-0.59</b> | <b>0.01</b> | <b>-0.48</b> | <b>0.05</b> | <b>0.68</b>  | <b>0.003</b> | <b>0.54</b>          | <b>0.03</b> | <b>0.61</b> | <b>0.01</b> | 0.43              | 0.09     |
| Sodium<br>(135-147)     | 143.4 $\pm$ 0.5<br>140-147   | 0.18         | 0.50        | 0.30         | 0.25        | -0.17        | 0.52         | -0.30                | 0.21        | -0.23       | 0.39        | 0.17              | 0.52     |
| Chloride<br>(96-106)    | 103.1 $\pm$ 0.6<br>97.4-108  | -0.06        | 0.81        | 0.02         | 0.90        | 0.34         | 0.18         | 0.21                 | 0.42        | -0.11       | 0.67        | -0.02             | 0.88     |
| Calcium<br>(2.0-2.5)    | 2.28 $\pm$ 0.02<br>2.13-2.42 | -0.42        | 0.10        | -0.42        | 0.11        | 0.44         | 0.09         | 0.23                 | 0.42        | 0.46        | 0.07        | 0.42              | 0.11     |
| Magnesium<br>(0.8-1.25) | 1.0 $\pm$ 0.03<br>0.84-1.26  | 0.49         | 0.06        | <b>0.64</b>  | <b>0.01</b> | -0.22        | 0.43         | <b>-0.51</b>         | <b>0.05</b> | -0.40       | 0.13        | -0.44             | 0.09     |
| Glucose<br>(3.89-6.11)  | 5.14 $\pm$ 0.16<br>4.31-7.02 | -0.25        | 0.35        | -0.31        | 0.24        | -0.10        | 0.69         | 0.07                 | 0.77        | 0.09        | 0.71        | 0.27              | 0.29     |
| Urea<br>(1.7-8.3)       | 4.32 $\pm$ 0.31<br>2.83-6.86 | -0.15        | 0.58        | 0.13         | 0.65        | 0.08         | 0.77         | -0.30                | 0.27        | 0.01        | 0.90        | -0.02             | 0.90     |
| Creatine<br>(40-124)    | 75.8 $\pm$ 3.5<br>57-111     | 0.31         | 0.26        | -0.02        | 0.88        | -0.09        | 0.73         | -0.24                | 0.38        | -0.23       | 0.41        | 0.05              | 0.84     |

Serum levels are expressed in mmol/L except for creatine ( $\mu$ mol/L). Normal ranges for serum concentrations are shown in brackets. *R* = the correlation coefficient between the excitability parameter and the serum concentration. *P* = the probability of obtaining such a correlation by chance. Significant correlations are bolded.

Table 4. FCR axon excitability parameters in healthy control limbs

| Excitability parameter       | Current study | Jankelowitz and Burke, 2009* | Percent |
|------------------------------|---------------|------------------------------|---------|
| Stimulus-response            |               |                              |         |
| CMAP peak (mV)               | 9.8 ± 0.3     | 9.6 ± 1.1                    | 102     |
| Stimulus (mA) for 50%max     | 5.9 ± 0.4     | 10.1 ± 1.1 <sup>+</sup>      | 58      |
| Stimulus-response slope      | 3.5 ± 0.1     | 3.0 ± 1.1                    | 117     |
| Stimulus width-charge        |               |                              |         |
| SDTC (ms)                    | 0.487 ± 0.018 | 0.43 ± 0.01                  | 113     |
| Rheobase (mA)                | 3.8 ± 0.3     | 6.9 ± 1.1                    | 55      |
| Recovery cycle               |               |                              |         |
| RRP (ms)                     | 3.73 ± 0.16   | 3.7 ± 1.0                    | 100     |
| Refractoriness at 2.5 ms (%) | 33.1 ± 3.6    | 47.0 ± 4.2                   | 70      |
| Superexcitability (%)        | -8.2 ± 1.3    | -9.1 ± 1.5                   | 90      |
| Subexcitability (%)          | 13.1 ± 1.6    | 14.7 ± 2.2                   | 89      |
| TE to ± 40% currents         |               |                              |         |
| TEd(10-20 ms) (%)            | 61.9 ± 1.0    | 55.9 ± 1.3                   | 110     |
| TEd(40-60 ms) (%)            | 49.7 ± 1.0    | 45.1 ± 0.9                   | 110     |
| TEd(90-100 ms) (%)           | 44.9 ± 1.1    | 41.7 ± 0.6                   | 108     |
| TEd(undershoot) (%)          | -12.9 ± 0.6   | -11.4 ± 1.0                  | 113     |
| S2 accommodation (%)         | 17.0 ± 0.7    | 14.6 ± 1.1                   | 116     |
| TEh(10-20 ms) (%)            | -69.4 ± 1.1   | -64.6 ± 2.0                  | 107     |
| TEh(20-40 ms) (%)            | -85.8 ± 1.7   | -81.7 ± 2.3                  | 105     |
| TEh(90-100 ms) (%)           | -120.1 ± 3.5  | -117.3 ± 3.9                 | 102     |
| TEh(overshoot) (%)           | 5.9 ± 0.6     | 7.2 ± 0.5                    | 82      |
| I/V relationship             |               |                              |         |
| Resting I/V slope            | 0.60 ± 0.01   | 0.64 ± 0.00                  | 94      |
| Minimum I/V slope            | 0.18 ± 0.00   | 0.20 ± 0.00                  | 90      |
| Hyperpolarizing I/V slope    | 0.23 ± 0.01   | 0.3 ± 0.00                   | 77      |

Values are means ± SE

\* 7 males and 8 females, mean age 44.2 y. Mean values taken from their Table 1.

<sup>+</sup> The mean stimulus required to produce the unconditioned test CMAP (~40% of maximum).

Percent = current study mean/previous study mean x 100

Table 5. FCR axon excitability parameters in the paretic and non-paretic limbs after stroke

| Excitability parameter   | Paretic<br>Current study | Paretic<br>Huynh et al.,<br>2013* | %   | Nonparetic<br>Current study | Nonparetic<br>Huynh et al.,<br>2013* | %   |
|--------------------------|--------------------------|-----------------------------------|-----|-----------------------------|--------------------------------------|-----|
| Stimulus-response        |                          |                                   |     |                             |                                      |     |
| CMAP peak (mV)           | 7.6 ± 0.7                | 7.6 ± 1.1                         | 100 | 9.4 ± 0.4                   | 6.4 ± 1.1                            | 146 |
| Stimulus (mA) for 50%max | 7.9 ± 0.7                | 10.8 ± 1.2 <sup>+</sup>           | 73  | 7.4 ± 0.6                   | 9.4 ± 1.2                            | 79  |
|                          |                          |                                   |     |                             |                                      |     |
| Stimulus width-charge    |                          |                                   |     |                             |                                      |     |
| SDTC (ms)                | 0.456 ± 0.015            | 0.47 ± 0.02                       | 97  | 0.418 ± 0.016               | 0.45 ± 0.04                          | 93  |
|                          |                          |                                   |     |                             |                                      |     |
| TE to ± 40% currents     |                          |                                   |     |                             |                                      |     |
| TEd(90-100 ms) (%)       | 50.4 ± 1.8               | 46.5 ± 3.5                        | 108 | 51.0 ± 1.6                  | 45.1 ± 3.0                           | 113 |
| S2 accommodation (%)     | 15.9 ± 0.6               | 15.3 ± 2.0                        | 104 | 16.0 ± 1.0                  | 15.7 ± 1.9                           | 102 |
| TEh(90-100 ms) (%)       | -138.7 ± 7.1             | -122.3 ± 3.0                      | 113 | -136.2 ± 5.5                | -115.5 ± 4.3                         | 118 |
|                          |                          |                                   |     |                             |                                      |     |
| I/V relationship         |                          |                                   |     |                             |                                      |     |
| Resting I/V slope        | 0.53 ± 0.03              | 0.64 ± 0.04                       | 83  | 0.52 ± 0.02                 | 0.61 ± 0.08                          | 85  |
| Minimum I/V slope        | 0.17 ± 0.00              | 0.17 ± 0.03                       | 100 | 0.17 ± 0.00                 | 0.19 ± 0.02                          | 89  |

Values are means ± SE

\* Stroke subjects (N = 5, 63 y old, 4.4 y post stroke, Fugl-Meyer score, 5.6). Mean values taken from their Table 3, before botox injection.

<sup>+</sup> The mean stimulus required to produce the unconditioned test CMAP (~40% of maximum).

% = current study mean/previous study mean x 100.

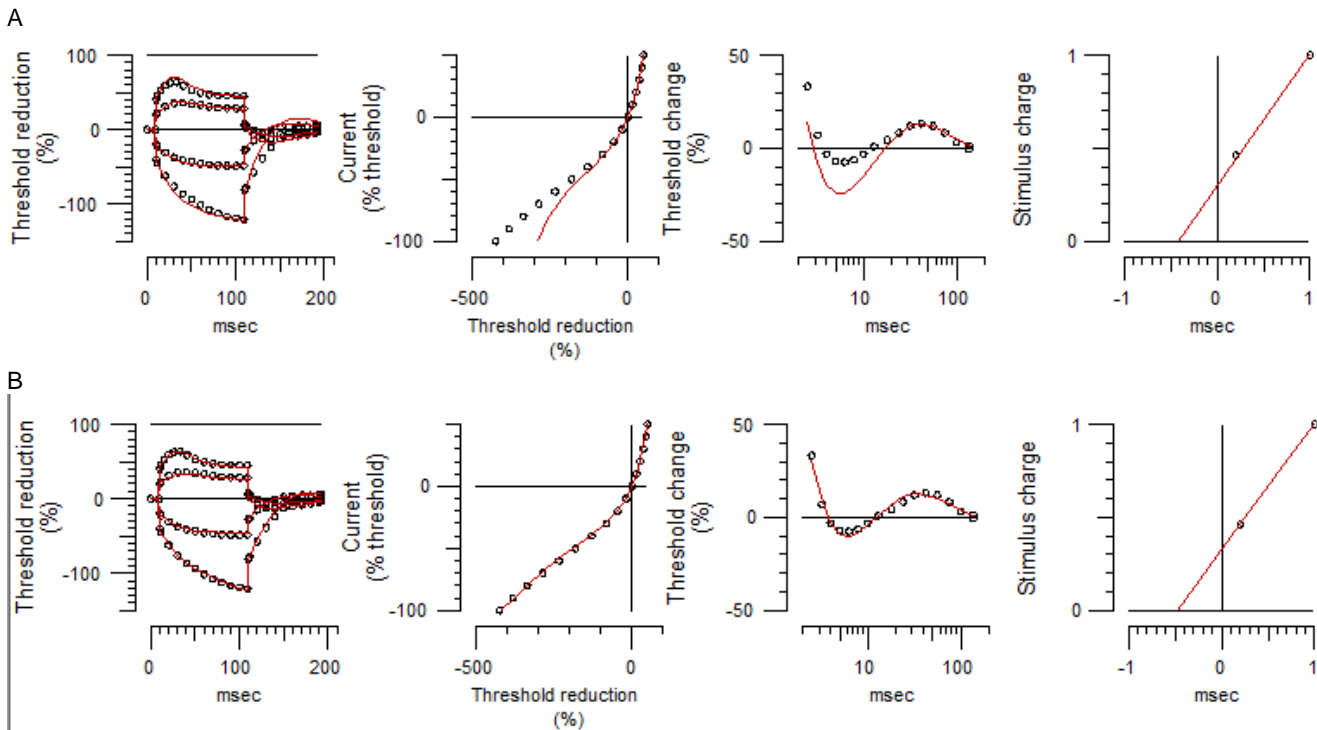

Fig 1. Modeling FCR axonal behavior in the healthy control subjects. **(A)** Control group mean FCR responses (unfilled symbols) are shown together with the best fit model for abductor pollicis brevis (APB) axonal behavior in normal controls reported previously (Kiernan et al., 2000) (red line; NC29 parameters included in the Qtrac software). Relative to APB axons, FCR axons show larger thresholds during the strongest hyperpolarizing currents of the current-threshold (I/V) test and larger refractoriness and smaller superexcitability in the recovery cycle. These FCR-APB axonal differences are consistent with the actual recorded differences in healthy adults (Jankelowitz et al., 2009). **(B)** Control group mean FCR responses (unfilled symbols) together with the best fit model, starting with the NC29 parameters (same as Fig. 3A). Changes in a number of parameters were necessary to fit the FCR responses (see text of manuscript and Supplementary Table 1). Left to right panels: Threshold electrotonus, I/V relationship, recovery cycle, and strength-duration properties.

## Fit to nonparetic limb

A

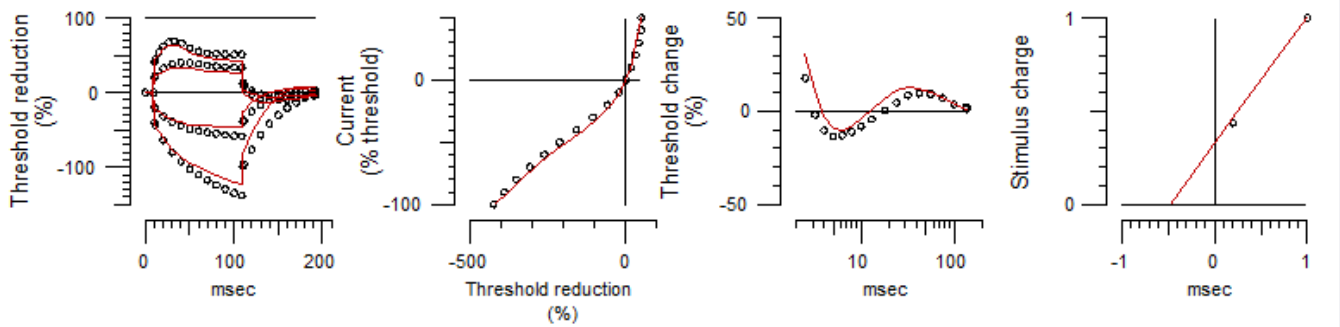

B 2.6-fold increase in the pump current (IPumpNI)

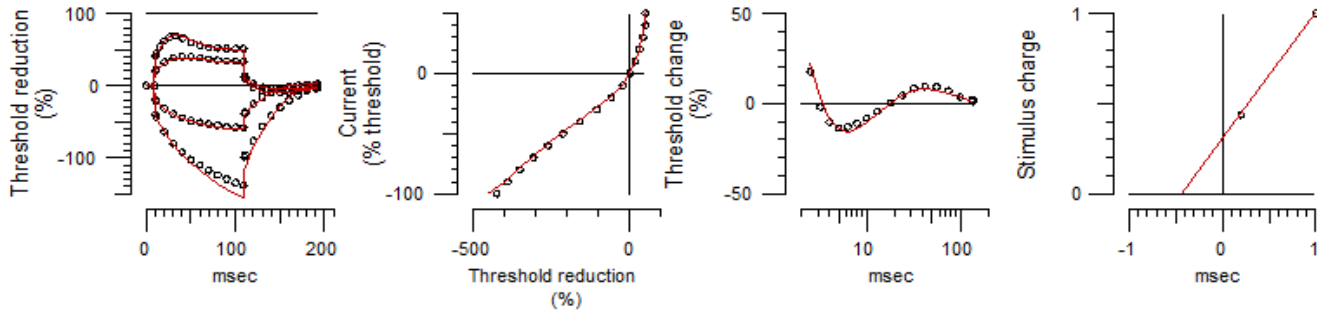

C 38% increase in internodal leak conductance (GLkI)

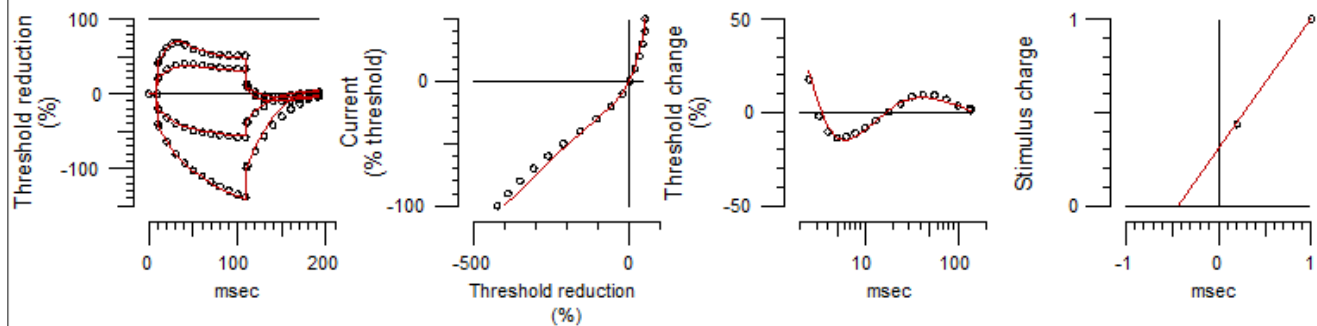

D 23% decrease internodal H conductance (Ih)

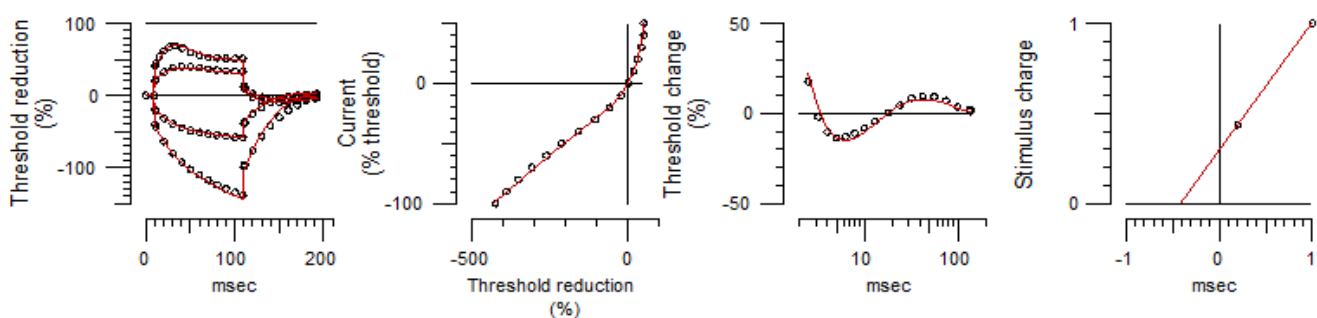

Fig. 2. Modeling nonparetic limb FCR axonal behavior. Unfilled symbols in all panels are the nonparetic limb mean recorded responses. **(A)** Nonparetic limb mean responses together with the modeled control limb responses (red line). The differences between these limbs may be explained by stroke-induced changes in axonal properties; namely, membrane hyperpolarization and altered makeup of hyperpolarization-activated (HCN) channels as suggested by the modeled responses in B-D. **(B)** A 2.6 fold increase in the pump current, from 0.0068 to 0.0175, lead to a 2.1 mV hyperpolarization of the nodal resting potential; from  $\sim -85.5$  mV in the control group to 87.6 mV in the nonparetic limb. **(C)** A 38% increase  $[(3.1-2.25)/2.25 \times 100]$  in internodal leak conductance (GLkI) was necessary to further improve the fit to hyperpolarizing threshold electrotonus (from a control group value of 2.25 to 3.1 in the nonparetic limb). **(D)** Finally, a 23% reduction in internodal H conductance ( $I_h$ ) was needed to further improve the fit of the strongest hyperpolarizing currents of the I/V test (from a control group value of 1.55 to 1.2 in the nonparetic limb) (same as Fig. 3B). The net result of these changes was a 2.3 mV hyperpolarization of the nodal resting potential in the nonparetic limb (from  $-85.5$  mV in the control group to 87.8 mV in the nonparetic limb) and a 2.4 mV hyperpolarization of the internodal resting potential (from  $-85.7$  mV in the control group to 88.1 mV in the nonparetic limb).

## Fit to the paretic limb

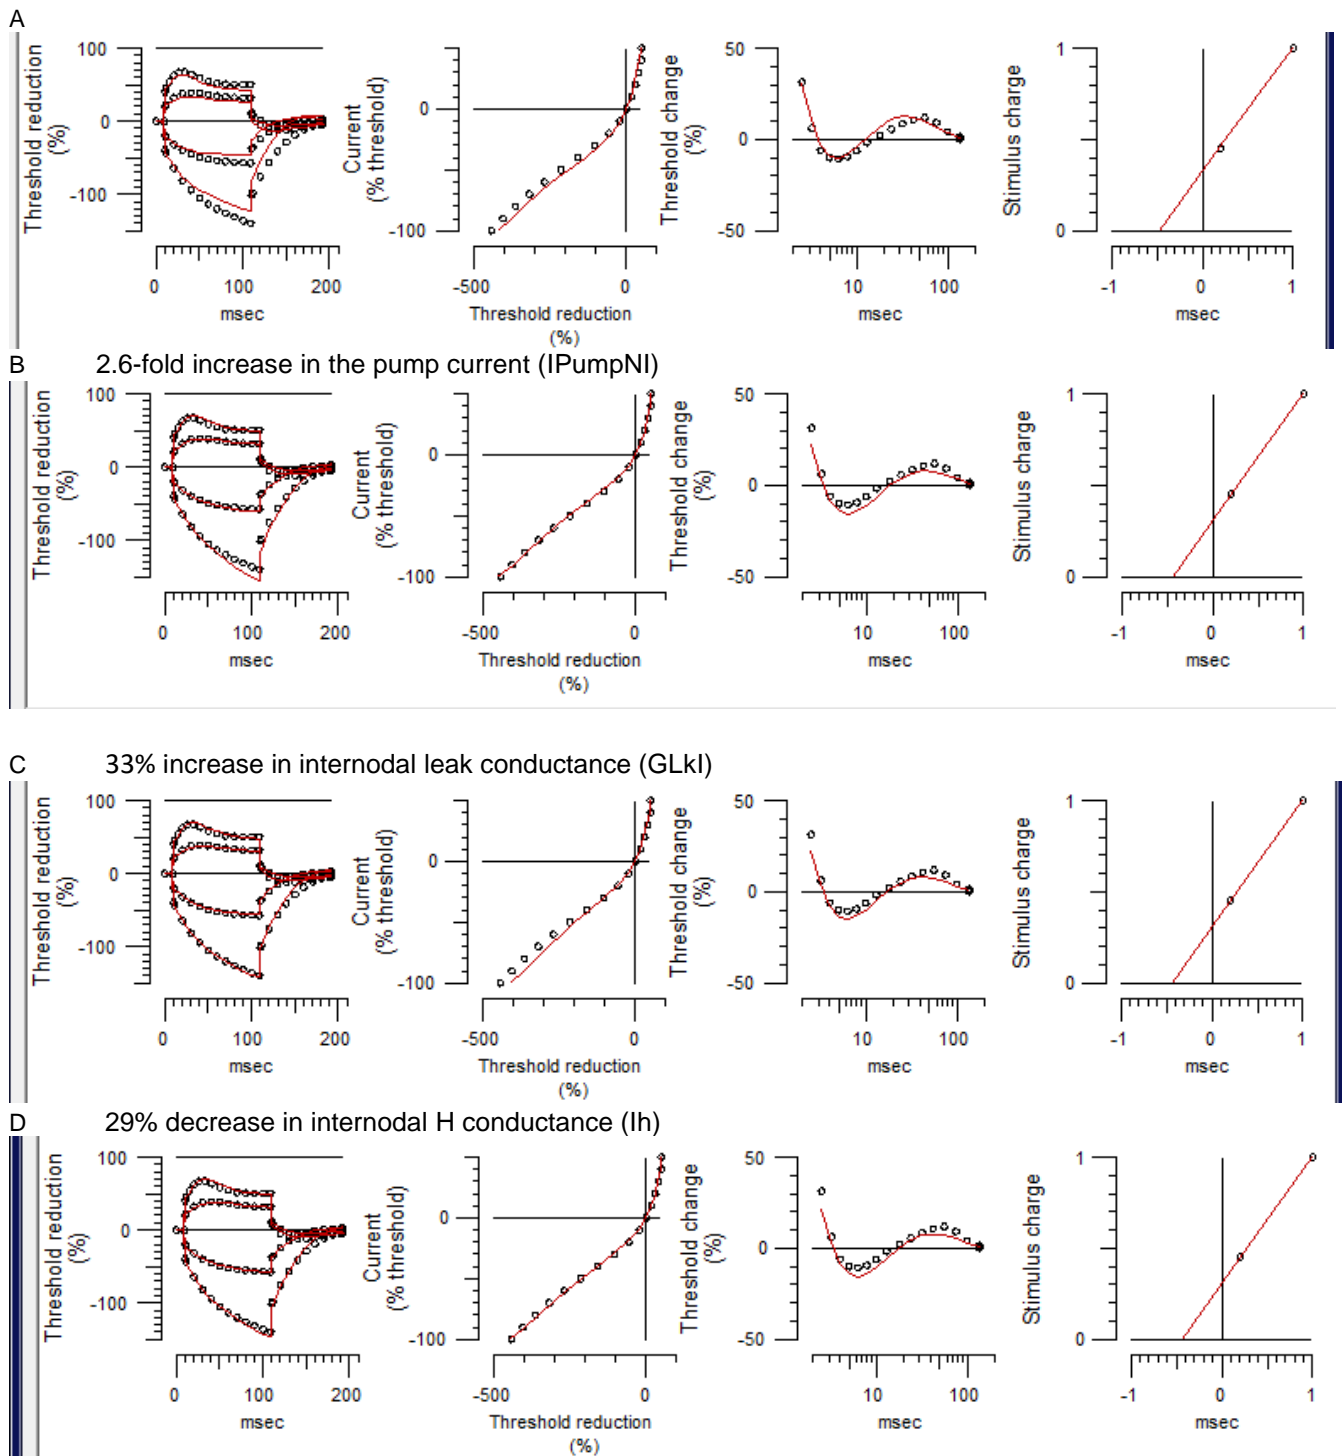

E 14% decrease in rate activation of the Na<sup>+</sup> channel h gate (Aah)

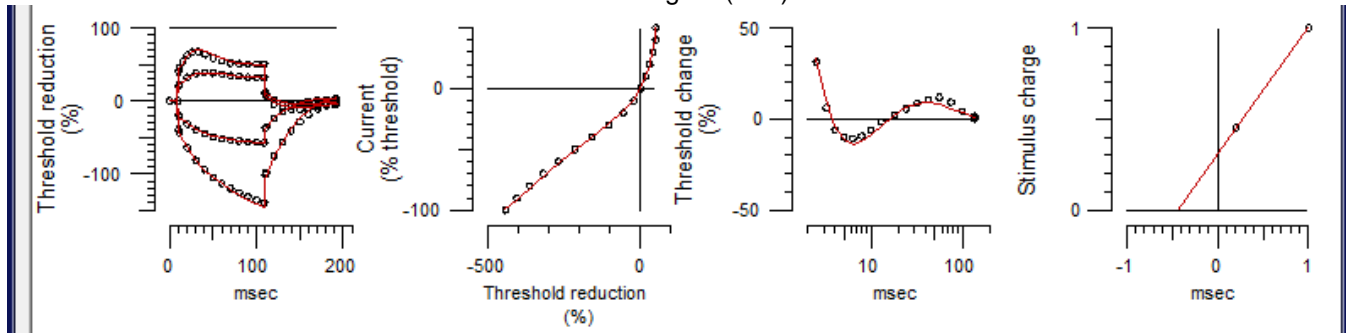

Fig. 3. Modeling paretic limb FCR axonal behavior starting with the control limb model parameters. Unfilled symbols in all panels are the paretic limb mean recorded responses. **(A)** Paretic limb mean responses together with the modeled control limb responses (red line). The differences between these limbs may be explained by stroke-induced changes in axonal properties; namely, membrane hyperpolarization, altered makeup of HCN channels, and altered Na<sup>+</sup> channel gating as suggested by the modeled responses in B-E. **(B)** A 2.6 fold increase in the pump current, from 0.0068 to 0.0175, lead to a 2.1 mV hyperpolarization of the nodal resting potential; from ~ -85.5 mV in the control group to 87.6 mV in the paretic limb. **(C)** A 33% increase in internodal leak conductance (GLkI) was necessary to further improve the fit to hyperpolarizing threshold electrotonus (from a control group value of 2.25 to 3.0 in the paretic limb). **(D)** A 29% reduction in internodal H conductance (I<sub>h</sub>) was needed to further improve the fit of the strongest hyperpolarizing currents of the I/V test (from a control group value of 1.55 to 1.1 in the paretic limb). **(E)** A 14% reduction in the rate activation of the Na<sup>+</sup> channel h gate (Aah) was needed to better fit the refractory period and superexcitability: from 0.0245 in the control limb to 0.021 in the paretic limb (same as Fig. 3C). The net result of these changes was a 2.3 mV hyperpolarization of the nodal resting potential in the paretic limb (from -85.5 mV in the control group to 87.8 mV in the paretic limb) and a 2.5 mV hyperpolarization of the internodal resting potential (from -85.7 mV in the control group to 88.2 mV in the paretic limb).



## Fit to the paretic limb

A

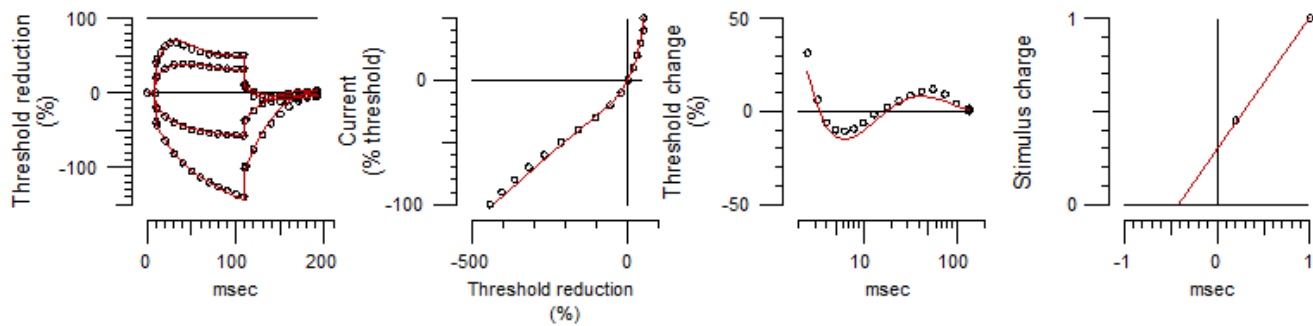

B 17% decrease internodal H conductance ( $I_h$ )

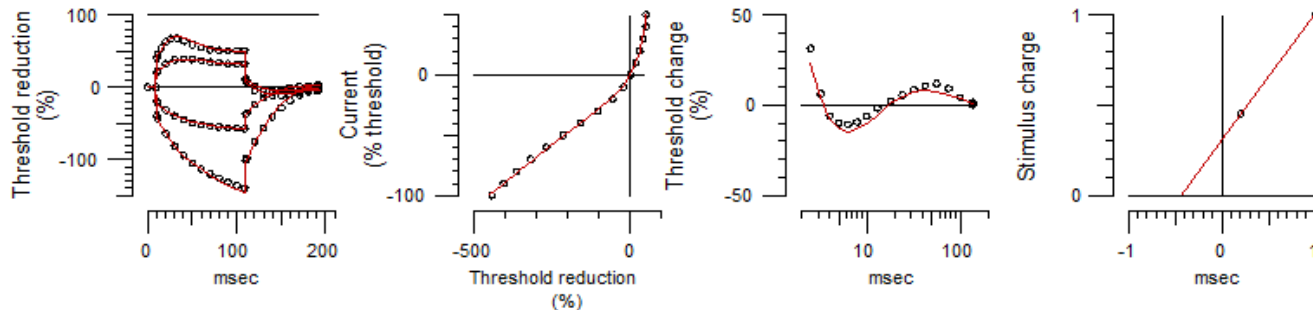

C 14 % decrease in rate activation of the  $\text{Na}^+$  channel h gate (Aah)

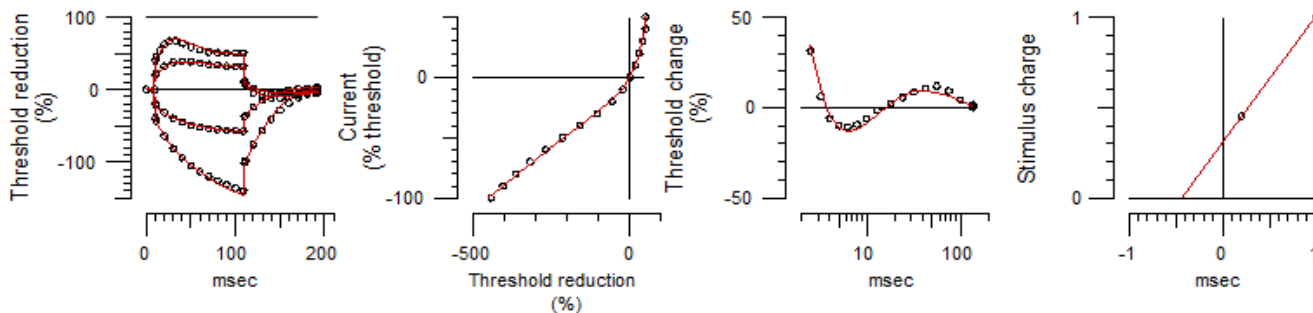

Fig. 4. Modeling paretic limb FCR axonal behavior starting with the nonparetic limb model parameters. Unfilled symbols in all panels are the paretic limb mean recorded responses (**A**) Paretic limb mean responses together with the modeled nonparetic limb responses (red line). The subtle differences between limbs, apparent during hyperpolarizing responses of the I/V test and during the recovery cycle, may be explained by differences in ion channel properties as suggested by the modeled responses in B-C. (**B**) A 17% reduction in H conductance ( $I_h$ ) was needed to best fit the stronger hyperpolarizing I/V responses; from 1.2 in the nonparetic limb to 1.0 in the paretic limb. (**C**) A 14% reduction in the rate activation of the  $\text{Na}^+$  channel h gate (Aah) was needed to better fit the refractory period and superexcitability: from 0.0245 in the nonparetic limb to 0.021 in the paretic limb (same as Fig. 3D).

## References

- Huynh W, Krishnan AV, Lin CS, Vucic S, Katrak P, Hornberger M, et al. Botulinum toxin modulates cortical maladaptation in post-stroke spasticity. *Muscle Nerve* 2013;48:93-9.
- Jankelowitz SK, Burke D. Axonal excitability in the forearm: normal data and differences along the median nerve. *Clin Neurophysiol* 2009;120:167-73.
- Kiernan MC, Burke D, Andersen KV, Bostock H. Multiple measures of axonal excitability: a new approach in clinical testing. *Muscle Nerve* 2000;23:399-409.
